# Supplementary material for: Sonic Hedgehog and Gli1 Expression Predict Outcome in Resected Pancreatic Adenocarcinoma
Source: Oxford University Press journal article supplement (doi:10.1158/1078-0432.ccr-14-0667), 2014-12-31
Supplement: 10780432ccr140667-sup-128210_3_supp_2780951_ngff2n.doc [file 10780432ccr140667-sup-128210_3_supp_2780951_ngff2n.doc]

**Sonic Hedgehog and Gli1 expression predict outcome in resected pancreatic adenocarcinoma**

**Supplementary tables**

**Supplementary table1**. Correlation between immunohistochimical factors and clinicopathological data

|  | **Training set (n=237)** | | | | **Validation set (n=234)** | | | |
| --- | --- | --- | --- | --- | --- | --- | --- | --- |
| Variable | **Shh** | **Gli1** | **PTCH1** | **SMO** | **Shh** | **Gli1** | **PTCH1** | **SMO** |
| Shh |  | Rho = 0,147  p = 0,025 | Rho = -0,037  p=0,578 | Rho = -0,036  p= 0,590 |  | Rho = 0,118  p = 0,071 | Rho = -0,041  p = 0,535 | Rho = 0,094  p = 0,153 |
| Gli1 | Rho = 0,147  p = 0,025 |  | Rho = 0,025  p= 0,697 | Rho = -0,043  p = 0,525 | Rho = 0,118  p = 0,071 |  | Rho = 0,100  p = 0,127 | Rho = 0,035  p = 0,597 |
| PTCH1 | Rho = -0,037  p = 0,578 | Rho = 0,025  p = 0,697 |  | Rho = -0,057  p = 0,397 | Rho = -0,041  p = 0,535 | Rho = 0,100  p = 0,127 |  | Rho = 0,040  p = 0,544 |
| SMO | Rho = -0,036  p = 0,590 | Rho = -0,043  p = 0,525 | Rho = -0,057  p = 0,397 |  | Rho = 0,094  p = 0,153 | Rho = 0,035  p = 0,597 | Rho = 0,040  p = 0,544 |  |
| T1-T2 vs T3 | Rho = -0,120  p = 0,067 | Rho = -0,035  p = 0,595 | Rho = -0,042  p = 0,518 | Rho = 0,090  p = 0,180 | Rho = 0,046  p = 0,486 | Rho = 0,074  p = 0,259 | Rho = -0,097  p = 0,140 | Rho = 0,067  p = 0,305 |
| N0 vs N1 | Rho = 0,001  p = 0,996 | Rho = -0,011  p = 0,867 | Rho = -0,065  p = 0,324 | Rho = -0,032  p = 0,637 | Rho = 0,113  p = 0,085 | Rho = 0,057  p = 0,388 | Rho = -0,094  p = 0,150 | Rho = -0,102  p = 0,120 |
| Lymphovascular emboli | Rho = -0,022  p = 0,734 | Rho = -0,041  p = 0,528 | Rho = -0,148  p = 0,023 | Rho = 0,114  p = 0,090 | Rho = 0,013  p = 0,845 | Rho = 0,035  p = 0,595 | Rho = -0,008  p = 0,899 | Rho = -0,027  p = 0,685 |
| Perineural invasion | Rho = 0,052  p = 0,432 | Rho = 0,007  P = 0,919 | Rho = -0,080  p = 0,229 | Rho = -0,075  p = 0,267 | Rho = -0,016  p = 0,801 | Rho = -0,096  p = 0,143 | Rho = -0,087  p = 0,181 | Rho = 0,036  p = 0,579 |
| Poorly differentiated tumor | Rho = 0,045  p = 0,495 | Rho = 0,067  P = 0,306 | Rho = 0,009  p = 0,890 | Rho = 0,136  p = 0,044 | Rho = -0,027  p = 0,683 | Rho = -0,005  p = 0,938 | Rho = 0,000  p = 1,00 | Rho = 0,044  p = 0,513 |
| Positive margins | Rho = 0,027  p = 0,677 | Rho = 0,156  p = 0,016 | Rho = -0,027  p = 0,682 | Rho = -0,003  p= 0,960 | Rho = 0,056  p = 0,388 | Rho = 0,171  p = 0,010 | Rho = -0,003  p = 0,958 | Rho = 0,031  p = 0,632 |
| Sexe | Rho = 0,001  p = 0,990 | Rho = 0,064  p = 0,327 | Rho = 0,027  p = 0,675 | Rho = 0,016  p = 0,814 | Rho = -0,053  p = 0,421 | Rho = 0,007  p = 0,920 | Rho = 0,02  p = 0,760 | Rho = -0,005  p = 0,934 |
| Adjuvant therapy | Rho = 0,040  p = 0,543 | Rho = 0,085  p = 0,192 | Rho = -0,017  p = 0,798 | Rho = -0,102  p = 0,127 | Rho = -0,059  p = 0,374 | Rho = -0,028  p = 0,676 | Rho = -0,002  p = 0,981 | Rho = -0,130  p = 0,052 |

**Supplementary table 2**

Univariate analyses of patients characteristics and IHC factors to disease-free survival

|  |  | Brussels cohort (n=237) | | |  | Paris cohort (n=234) | | | Marseille cohort (n=96) | | | |
| --- | --- | --- | --- | --- | --- | --- | --- | --- | --- | --- | --- | --- |
| Variable | No. | % | Median DFS,  months  (95% CI) | Log-Rank  p-value | No. | % | Median DFS,  months  (95% CI) | Log-Rank  p-value | No. | % | Median DFS, months  (95% CI) | Log-Rankp-value |
| Gender |  |  |  |  |  |  |  |  |  |  |  |  |
| Female | 120 | 50.6 | 16.4 (10.3-22.6) | 0.104 | 118 | 50.4 | 15.8 (9.9-21.6) | 0.356 | 41 | 42.7 | 17.2 | 0.686 |
| Male | 117 | 49.4 | 11.8 (8.9-14.6) |  | 116 | 49.6 | 14.4 (11.3-17.5) |  | 55 | 56.3 | 21.9 (16.9-26.9) |  |
| recurrence | 158 | 67.5 |  |  | 159 | 71.3 |  |  | 51 | 53.1 |  |  |
| Resection margins |  |  |  |  |  |  |  |  |  |  |  |  |
| R0 | 191 | 80.6 | 15.1 (10.8-19.3) | 0.021 | 189 | 80.8 | 16.8 (13.4-20.1) | <0.001 | 64 | 66.7 | 24.4 (­NE) | 0.031 |
| R1 | 46 | 19.4 | 10.4 (8.1-12.7) |  | 45 | 19.2 | 10.3 (8.6-12.09) |  | 32 | 33.3 | 14.4 (8.3-20.6) |  |
| Tumor Differentiation |  |  |  |  |  |  |  |  |  |  |  |  |
| well | 97 | 40.9 | 19.2 ((14.7-23.7) | 0.023 | 104 | 44.4 | 16.8 (12.6-20.9) | 0.256 | 31 | 32.2 | NR | 0.394 |
| moderate | 97 | 40.9 | 11.8 (9.7-13.8) |  | 92 | 39.3 | 12.9 (10.2-15.5) |  | 46 | 49 | 15.9 (5.0-26.7) |  |
| poor | 39 | 16.5 | 10.3 (7.9-12.6) |  | 28 | 12.0 | 12.6 (7.8-17.5) |  | 19 | 19.8 | 19.1 (15.5-22.7) |  |
| unknown | 4 | 1.7 | 13.5 (10.9-16.1) |  | 10 | 4.3 | 14.5 (11.9-17.2) |  |  |  |  |  |
| Tumor stage |  |  |  |  |  |  |  |  |  |  |  |  |
| T1/T2 | 36 | 15.2 | 30.0 (13.0-47.1) | 0.036 | 49 | 20.9 | 19.8 (11.2-28.3) | 0.084 | 18 | 18.8 | NR | 0.008 |
| T3 | 201 | 84.8 | 12.3 (10.7-13.8) |  | 185 | 79.1 | 14.4 (11.9-16.8) |  | 78 | 81.2 | 17.2 (11.7-22.6) |  |
| Lymph Nodes |  |  |  |  |  |  |  |  |  |  |  |  |
| negative, N0 | 63 | 26.6 | 42.6 (11.8-73.4) | <0.001 | 57 | 24.4 | 26.0 (7.2-44.8) | 0.002 | 25 | 26.0 | NR |  |
| positive, N1 | 174 | 73.4 | 11.8 (10.2-13.5) |  | 177 | 75.6 | 12.6 (10.8-14.5) |  | 71 | 74.0 | 15.8 (11.6-19.9) | <0.001 |
| Perineural invasion |  |  |  |  |  |  |  |  |  |  |  |  |
| negative | 47 | 19.8 | 22.8 (5.5-40.1) | 0.033 | 79 | 33.8 | 16.8 (12.3-21.2) | 0.557 | 31 | 32.3 | 24.4 | 0.499 |
| positive | 185 | 78.1 | 12.3 (10.6-14.0) |  | 155 | 66.2 | 13.8 (10.9-16.6) |  | 65 | 67.7 | 19.1 (13.0-25.3) |  |
| unknown | 5 | 2.1 |  |  |  |  |  |  |  |  |  |  |
| Lymphovascular invasion |  |  |  |  |  |  |  |  |  |  |  |  |
| negative | 81 | 34.2 | 18.4 (7.8-29.0) | 0.110 | 99 | 42.3 | 16.7 (11.0-22.4) | 0.331 | 50 | 52.1 | NR | 0.021 |
| positive | 156 | 65.8 | 12.3 (10.7-13.9) |  | 135 | 57.7 | 14.4 (11.6-17.1) |  | 46 | 47.9 | 15.8 (11.1-20.4) |  |
| Adjuvant therapy |  |  |  |  |  |  |  |  |  |  |  |  |
| yes | 174 | 73.4 | 13.5 (7.6-19.4) | 0.681 | 145 | 62.0 | 12.7 (6.9-18.5) | 0.477 | NA |  |  |  |
| no | 63 | 26.6 | 13.6 (10.8-16.3) |  | 79 | 33.7 | 14.7 (11.7-17.7) |  | NA |  |  |  |
| unknown |  |  |  |  | 10 | 4.3 |  |  |  |  |  |  |
| Shh expression |  |  |  |  |  |  |  |  |  |  |  |  |
| Low | 148 | 62.4 | 20.9 (11.9-29.8) | <0.001 | 133 | 56.8 | 20.0 (14.6-25.3) | <0.001 | 62 | 64.6 | NR | <0.001 |
| High | 85 | 35.9 | 10.3 (8.9-11.6) |  | 101 | 43.2 | 10.1 (6.9-13.3) |  | 34 | 35.4 | 9.1 (3.6-14.6) |  |
| Unknown | 4 | 1.7 |  |  |  |  |  |  |  |  |  |  |
| Gli1 expression |  |  |  |  |  |  |  |  |  |  |  |  |
| Low | 115 | 48.5 | 25.0 (13.8-36.2) | <0.001 | 107 | 45.7 | 21.2 (9.3-33.2) | <0.001 | 58 | 60.4 | NR | <0.001 |
| High | 122 | 51.5 | 10.5 (11.0-16.1) |  | 126 | 53.8 | 12.4 (10.6-14.1) |  | 38 | 39.6 | 10.5 (3.0-18.0) |  |
| Unknown |  |  |  |  | 1 | 0.5 |  |  |  |  |  |  |
| SMO expression |  |  |  |  |  |  |  |  |  |  |  |  |
| Low | 177 | 74.7 | 13.6 (10.2-16.9) | 0.805 | 178 | 76.1 | 14.0 (11.4-16.7) | 0.592 |  |  |  |  |
| High | 45 | 19.0 | 14.0 (7.9-20.0) |  | 56 | 23.9 | 18.0 (12.9-23.1) |  |  |  |  |  |
| Unknown | 15 | 6.3 |  |  |  |  |  |  |  |  |  |  |
| PTCH1 expression |  |  |  |  |  |  |  |  |  |  |  |  |
| low | 165 | 69.6 | 13.3 (10.3-16.2) | 0.957 | 159 | 67.9 | 12.3 (9.2-15.4) | 0.916 |  |  |  |  |
| high | 66 | 27.7 | 14.2 (7.6-20.9) |  | 75 | 32.1 | 16.8 (12.8-20.7) |  |  |  |  |  |
| unknown | 6 | 2.5 |  |  |  |  |  |  |  |  |  |  |
| Abbreviation: CI: confidence interval, NA: non available, NE: not estimable, NR: not reached | | | | | | | | | | | | |

**Supplementary table 3**

Multivariate analysis for training and validation sets: clinicopathological variables

|  | **OS** | | | **DFS** | | |
| --- | --- | --- | --- | --- | --- | --- |
| **Variable** | **HR*** | **95% CI** | **p-value** | **HR** | **95% CI** | **p-value** |
| Brussels training cohort | (n=228, 149 events) | | | (n=222, 153 events) | | |
| T3 tumor | 0.85 | 0.54-1.35 | 0.501 | 1.18 | 0.71-2.44 | 0.531 |
| Margin positive | 1.58 | 1.05-2.39 | 0.030 | 1.51 | 1.02-2.24 | 0.042 |
| Node positive | 1.75 | 1.17-2.61 | 0.006 | 1.95 | 1.31-2.93 | 0.001 |
| Poorly differentiated tumor | 1.71 | 1.11-2.62 | 0.014 | 1.61 | 1.07-2.44 | 0.023 |
| Perineural invasion | 1.45 | 0.93-2.29 | 0.104 | 1.30 | 0.85-1.98 | 0.222 |
| Adjuvant treatment | 0.68 | 0.53-0.98 | 0.036 | 0.65 | 0.49-0.91 | 0.018 |
| Harrell C Statistic |  | 0.623 |  |  | 0.624 |  |
| Paris validation cohort | (n=224, 129 events) | | | (n=224, 144 events) | | |
| T3 tumor | 1.22 | 0.79-1.91 | 0.371 | 1.20 | 0.80-1.81 | 0.375 |
| Margin positive | 2.25 | 1.44-3.50 | 0.001 | 2.22 | 1.47-3.34 | <0.001 |
| Node positive | 1.64 | 1.04-2.59 | 0.033 | 1.72 | 1.13-2.64 | 0.012 |
| Poorly differentiated tumor | 1.31 | 0.94-2.13 | 0.040 | 1.45 | 1.04-2.16 | 0.061 |
| Adjuvant treatment | 0.58 | 0.40-0.85 | 0.005 | 0.60 | 0.42-0.86 | 0.006 |
| Harrell C Statistic |  | 0.634 |  |  | 0.627 |  |
| Marseille validation cohort | (n=96, 47 events) | | | (n=96, 51 events) | | |
| Gli1 high | 1.87 | 1.06-3.46 | 0.044 | 2.30 | 1.28-4.15 | 0.006 |
| Shh high | 5.55 | 2.92-10.54 | <0.001 | 6.45 | 3.30-12.56 | <0.001 |
| T3 tumor | 1.42 | 0.57-3.57 | 0.455 | 1.96 | 0.68-5.57 | 0.207 |
| Margin positive | 2.17 | 1.17-4.02 | 0.014 | 2.35 | 0.93-5.96 | 0.071 |
| Node positive | 3.22 | 1.05-9.87 | 0.401 | 1.89 | 1.05-3.41 | 0.034 |
| Poorly differentiated tumor | 1.05 | 0.52-2.12 | 0.890 | 1.43 | 0.72-2.86 | 0.309 |
| Harrell C Statistic |  | 0.702 |  |  | 0.687 |  |
| * HR of 1 indicates no difference between the two groups of patients, whereas an HR>1 indicates an increased risk of death/failure | | | | | | |

**Supplementary Table 4**

Multivariate Analyses: OS for patients according to the nodal status

| Node-Positive Disease | | | | | | | | |
| --- | --- | --- | --- | --- | --- | --- | --- | --- |
|  | Brussels training cohort | | | | Paris validation cohort | | | |
|  | HR | 95% CI | p-value | No. of  Patients | HR | 95% CI | p-value | No. of  Patients |
| Gli1 and Shh low | 1 |  |  | 59 | 1 |  |  | 46 |
| Gli1 or Shh high | 3.19 | 1.98-5.15 | <0.001 | 73 | 2.15 | 1.29-3.58 | <0.001 | 82 |
| Gli1 and Shh high | 4.98 | 2.90-8.58 | <0.001 | 38 | 4.20 | 2.35-7.48 | <0.001 | 48 |
| Node-Negative Disease | | | | | | | | |
|  | Brussels training cohort | | | | Paris validation cohort | | | |
|  | HR | 95% CI | p-value | No. of  Patients | HR | 95% CI | p-value | No. of  Patients |
| Gli1 and Shh low | 1 |  |  | 21 | 1 |  |  | 20 |
| Gli1 or Shh high | 2.85 | 1.08-7.56 | 0.035 | 28 | 2.82 | 1.14-7.94 | 0.028 | 26 |
| Gli1 and Shh high | 10.06 | 3.48-29.06 | <0.001 | 14 | 5.53 | 1.63-18.77 | <0.001 | 10 |
| NOTE. Separate analyses were performed on either the training and the validation sets for the subset of patients with node-negative cancer and the subset with node-positive cancer.  HR>1 indicates an increased risk of death. In addition to Gli1 and Shh status, each models were adjusted for the following covariates: tumor differentiation (not poor *v* poor), T stage (T1-T2 *v* T3), resection margin (R0 *v* R1), adjuvant therapy (no *v* yes) | | | | | | | | |

**Supplementary Table 5**

Interaction between adjuvant therapy and biomarkers

| **Variable** | **Brussels training cohort**  (n=229, 147 events) | | | **Paris validation cohort**  (n=224,129 events) | | |
| --- | --- | --- | --- | --- | --- | --- |
| Interaction test | HR* | 95% CI | p-value | HR* | 95% CI | p-value |
| SMO | 1.36 | 0.57-3.22 | 0.48 | 0.99 | 0.40-2.49 | 0.161 |
| PTCH1 | 1.22 | 0.62-3.61 | 0.51 | 1.05 | 0.69-3.11 | 0.56 |
| Gli1 | 1.10 | 0.55-2.18 | 0.78 | 1.19 | 0.58-2.42 | 0.63 |
| Shh | 1.16 | 0.57-2.33 | 0.68 | 1.31 | 0.65-2.64 | 0.44 |
|  |  |  |  |  |  |  |
| * HR of 1 indicates no difference between the two groups of patients, whereas an HR>1 indicates an increased risk of death/failure  # The following covariates were used: nodal involvement (no *v* yes), tumor differentiation (not poor *v* poor), T stage (T1-T2 *v* T3), resection margin (R0 *v* R1) | | | | | | |

**Supplementary table 6**

Stromal index and patients’ outcomes

| Univariate analysis | | | | | | |
| --- | --- | --- | --- | --- | --- | --- |
| Variable | No. | % | Median OS,  months (95% CI) | Log-Rank  p-value | Median DFS,  months (95% CI) | Log-Rankp-value |
| Stromal index |  |  |  |  |  |  |
| Low | 38 | 46.3 | 24.4 (10.7-22.3) | 0.025 | 15.8 (5.7-13.1) | 0.038 |
| High | 44 | 53.7 | 16.5 (7.9-40.8) |  | 9.4 (7.7-23.9) |  |
| Multivariate analysis | | | | | | |
| Variable | No. | % | HR for OS* | 95% CI | | Log-Rankp-value |
| Stromal index |  |  |  |  | |  |
| Low | 38 | 46.3 | 1 |  | |  |
| High | 44 | 53.7 | 2.52 | (1.4-4.4) | | 0.025 |
| * Multivariate models adjusted for sex, nodal involvement (no *v* yes), tumor differentiation (not poor *v* poor), T stage (T1-T2 *v* T3), Resection margin (R0 *v* R1), adjuvant therapy (no *v* yes). | | | | | | |
